# Supplementary material for: Highly efficient quantum dot-sensitized TiO2solar cells based on multilayered semiconductors (ZnSe/CdS/CdSe)
Source: Royal Society of Chemistry journal article supplement (doi:10.1039/c4nr06935h), 2014-12-30
Supplement: c4nr06935h1.pdf [file c4nr06935h1.pdf]

Supporting Information

Highly Efficient Quantum Dot-Sensitized TiO<sub>2</sub> Solar Cells Based on Multilayered Semiconductors (ZnSe/CdS/CdSe)

Lin Yang, Connor McCue, Qifeng Zhang, Evan Uchaker, Yaohua Mai and Guozhong Cao

The calculation of the molar ratio (ZnSe : CdS : CdSe):

From EDX analysis as shown in Fig.2a, the atomic ratio of Zn : Cd : S : Se is found to be 42.6 : 77.4 : 28.1 : 91.7 for TiO<sub>2</sub>/ZnSe/CdS/CdSe, so the molar ratio of each compound can be calculated as follows:

$$\text{Zn}+\text{Cd}=42.6+77.4=120 \text{ (ZnSe+CdS+CdSe)} \quad \text{S}+\text{Se}=28.1+91.7=119.8 \text{ (ZnSe+CdS+CdSe)}$$

The total molar amount of the three compounds can be designated as 120 (or 119.8)

$$\begin{aligned} \text{Zn} &= 42.6/120 = 35.5\% \text{ (ZnSe)}; & \text{Cd} &= 77.4/120 = 64.5\% \text{ (CdS+CdSe)}; \\ \text{Se} &= 91.7/119.8 = 76.5\% \text{ (ZnSe+CdSe)}; & \text{S} &= 28.1/119.8 = 23.5\% \text{ (CdS)} \end{aligned}$$

$$\text{ZnSe} = \text{Zn} = 35.5\%;$$

$$\text{CdS} = \text{S} = 23.5\%;$$

$$\text{CdSe} = 64.5\% - 23.5\% = 41\%.$$

So the molar ratio of ZnSe, CdS and CdSe is **35.5 : 23.5 : 41.0**.

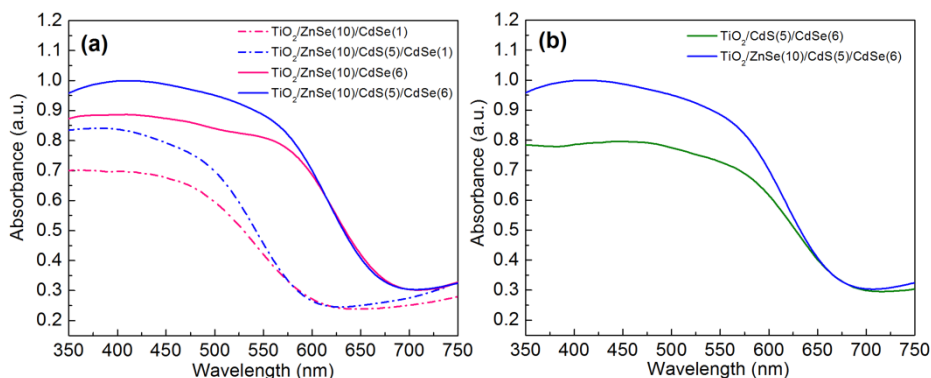

Figure S1. UV-vis absorption spectra of TiO<sub>2</sub>/ZnSe/CdSe, TiO<sub>2</sub>/CdS/CdSe, and TiO<sub>2</sub>/ZnSe/CdS/CdSe photoelectrode.

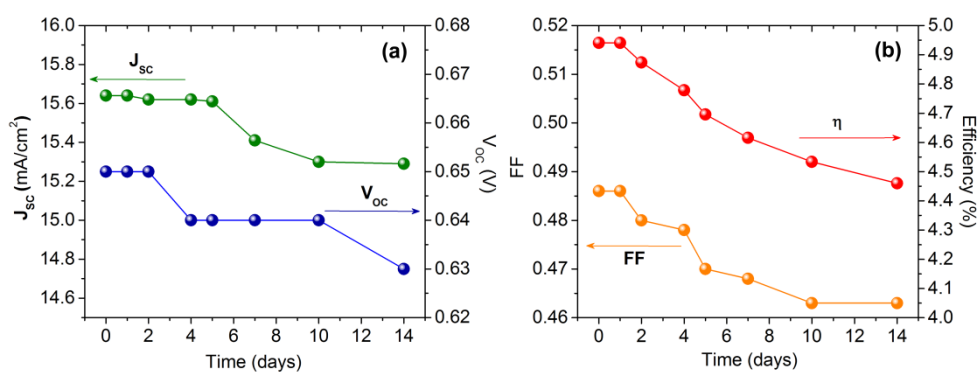

**Figure S2.** Temporal evolution of photovoltaic parameter values,  $J_{sc}$ ,  $V_{oc}$  (a), and FF,  $\eta$  (b) for QDSSCs based on  $\text{TiO}_2/\text{ZnSe}(10)/\text{CdS}(5)/\text{CdSe}(6)$  photoelectrode.

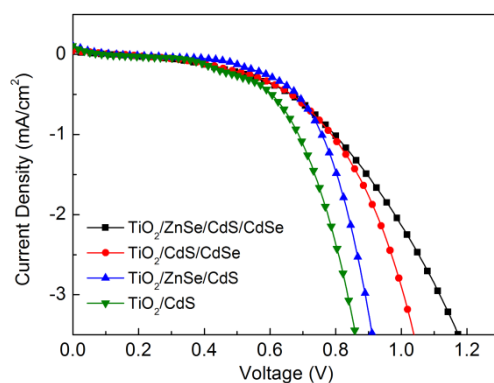

**Figure S3.** I–V characteristics measured under dark conditions of QDSSCs using various photoelectrode.

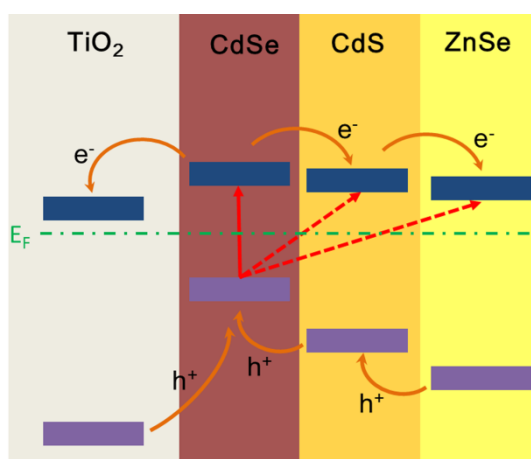

**Figure S4.** Transfer processes of the excited electrons and holes for  $\text{TiO}_2/\text{CdSe}/\text{CdS}/\text{ZnSe}$  photoelectrode.

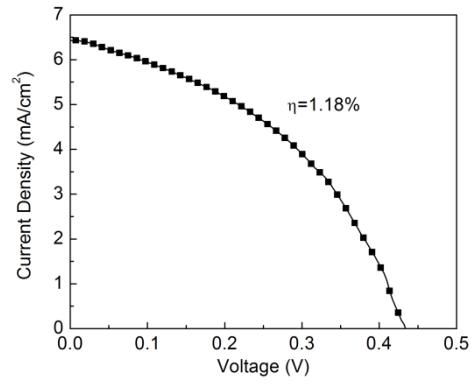

**Figure S5.** I–V characteristics of QDSSC using TiO<sub>2</sub>/CdSe/CdS/ZnSe photoelectrode.
